# Supplementary material for: Microbial Phenolic Metabolites in Urine Are Inversely Linked to Certain Features of Metabolic Syndrome in Spanish Adolescents
Source: MDPI journal article supplement (doi:10.3390/antiox11112191), 2022-11-05
Supplement: s1 [file s1]

## Supplementary data

### Microbial Phenolic Metabolites in Urine are Inversely Linked to Certain Features of Metabolic Syndrome in Spanish Adolescents

#### Content:

**Figure S1.** Flow-chart of study participants

**Figure S2.** Analysis flow-chart

**Table S1.** Phenolic metabolites identified and quantified in urine by HPLC-LTQ-Orbitrap-HRMS

**Table S2.** Log-transformed group of MPM and cardiometabolic health parameters

**Table S3.** Log-transformed group of MPM and MetS and its components

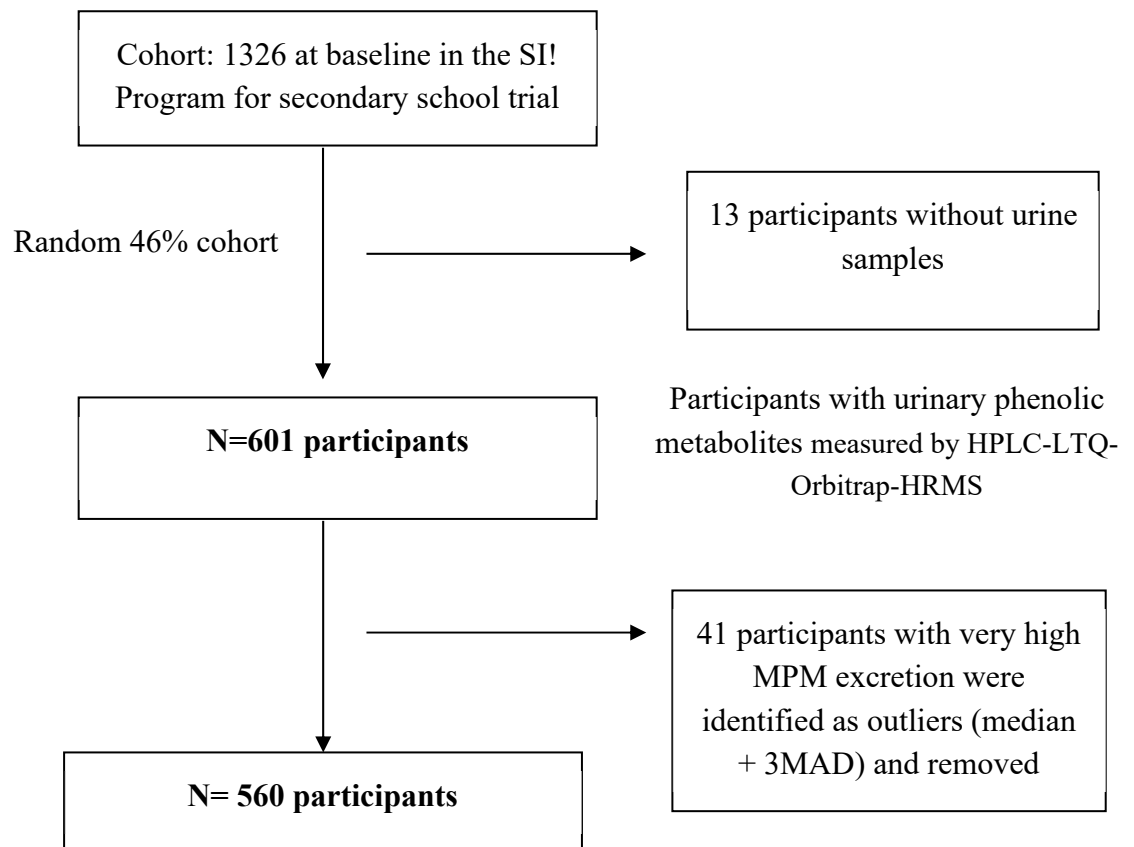

**Figure S1.** Flow-chart of study participants.

HPLC-LTQ-Orbitrap-HRMS High-performance liquid chromatography coupled to linear trap quadrupole Orbitrap high-resolution mass spectrometer, MAD median absolute deviation, MPM microbial phenolic metabolites.

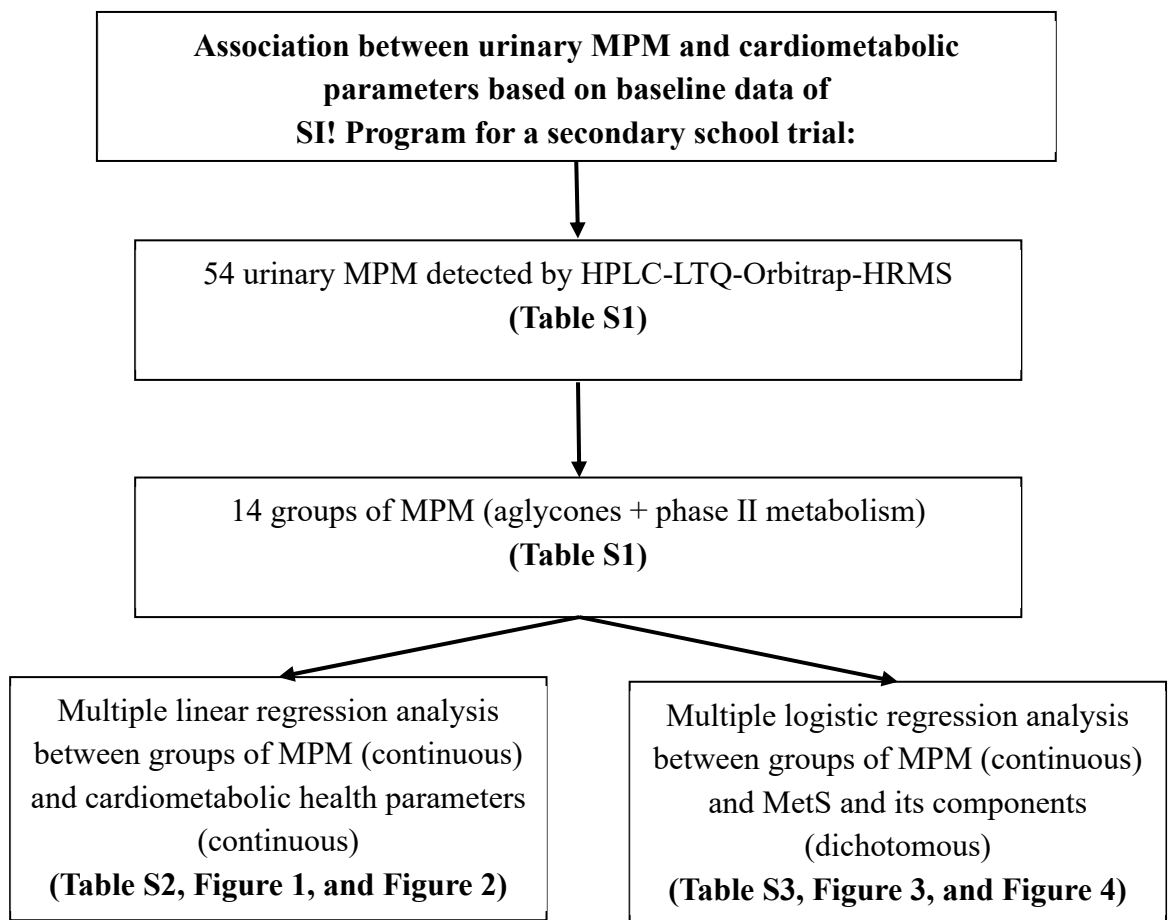

**Figure S2.** Analysis flow-chart.

HPLC-LTQ-Orbitrap-HRMS High-performance liquid chromatography coupled to linear trap quadrupole Orbitrap high-resolution mass spectrometer, MetS metabolic syndrome, MPM microbial phenolic metabolites.

**Table S1.** Phenolic metabolites identified and quantified in urine by HPLC-LTQ-Orbitrap-HRMS.

| Compound                                          | Neutral Molecular Formula                        | R <sub>t</sub> (min) |
|---------------------------------------------------|--------------------------------------------------|----------------------|
| <b>Coumaric acids</b>                             |                                                  |                      |
| <i>m</i> -coumaric acid <sup>a</sup>              | C <sub>9</sub> H <sub>8</sub> O <sub>3</sub>     | 6.54                 |
| <i>o</i> -coumaric acid <sup>a</sup>              | C <sub>9</sub> H <sub>8</sub> O <sub>3</sub>     | 7.20                 |
| <i>p</i> -coumaric acid <sup>a</sup>              | C <sub>9</sub> H <sub>8</sub> O <sub>3</sub>     | 5.96                 |
| Coumaric acid glucuronide I (CA)                  | C <sub>15</sub> H <sub>16</sub> O <sub>9</sub>   | 4.77                 |
| Coumaric acid glucuronide II (CA)                 | C <sub>15</sub> H <sub>16</sub> O <sub>9</sub>   | 5.09                 |
| Coumaric acid glucuronide III (CA)                | C <sub>15</sub> H <sub>16</sub> O <sub>9</sub>   | 5.82                 |
| Coumaric acid sulfate I (CA)                      | C <sub>9</sub> H <sub>8</sub> O <sub>6</sub> S   | 3.53                 |
| Coumaric acid sulfate II (CA)                     | C <sub>9</sub> H <sub>8</sub> O <sub>6</sub> S   | 4.27                 |
| Coumaric acid sulfate III (CA)                    | C <sub>9</sub> H <sub>8</sub> O <sub>6</sub> S   | 4.74                 |
| <b>Dihydroxyphenylpropionic acid</b>              |                                                  |                      |
| 3,4-dihydroxyphenylpropionic acid <sup>a</sup>    | C <sub>9</sub> H <sub>10</sub> O <sub>4</sub>    | 3.84                 |
| Dihydroxyphenylpropionic acid sulfate (3,4-DHPPA) | C <sub>9</sub> H <sub>10</sub> O <sub>7</sub> S  | 2.52                 |
| <b>Dihydroresveratrol</b>                         |                                                  |                      |
| Dihydroresveratrol <sup>a</sup>                   | C <sub>14</sub> H <sub>14</sub> O <sub>3</sub>   | 8.73                 |
| Dihydroresveratrol sulfate I (DHRSV)              | C <sub>14</sub> H <sub>14</sub> O <sub>6</sub> S | 7.07                 |
| Dihydroresveratrol sulfate II (DHRSV)             | C <sub>14</sub> H <sub>14</sub> O <sub>6</sub> S | 7.40                 |
| <b>Enterodiol</b>                                 |                                                  |                      |
| Enterodiol <sup>a</sup>                           | C <sub>18</sub> H <sub>22</sub> O <sub>4</sub>   | 9.17                 |
| Enterodiol glucuronide I (ED)                     | C <sub>24</sub> H <sub>30</sub> O <sub>10</sub>  | 7.48                 |
| Enterodiol glucuronide II (ED)                    | C <sub>24</sub> H <sub>30</sub> O <sub>10</sub>  | 7.61                 |
| Enterodiol sulfate (ED)                           | C <sub>18</sub> H <sub>20</sub> O <sub>7</sub> S | 7.50                 |
| <b>Enterolactone</b>                              |                                                  |                      |
| Enterolactone <sup>a</sup>                        | C <sub>18</sub> H <sub>18</sub> O <sub>4</sub>   | 10.80                |
| Enterolactone glucuronide (EL)                    | C <sub>24</sub> H <sub>26</sub> O <sub>10</sub>  | 8.77                 |
| Enterolactone diglucuronide (EL)                  | C <sub>30</sub> H <sub>34</sub> O <sub>16</sub>  | 7.24                 |
| Enterolactone sulfate (EL)                        | C <sub>18</sub> H <sub>18</sub> O <sub>7</sub> S | 8.57                 |
| <b>Gallic acid</b>                                |                                                  |                      |
| Gallic acid <sup>a</sup>                          | C <sub>7</sub> H <sub>6</sub> O <sub>5</sub>     | 1.69                 |
| Gallic acid glucuronide (GA)                      | C <sub>13</sub> H <sub>14</sub> O <sub>11</sub>  | 1.85                 |
| Gallic acid sulfate (GA)                          | C <sub>7</sub> H <sub>6</sub> O <sub>8</sub> S   | 1.72                 |
| <b>Hydroxybenzoic acid</b>                        |                                                  |                      |
| 3- hydroxybenzoic acid <sup>a</sup>               | C <sub>7</sub> H <sub>6</sub> O <sub>3</sub>     | 4.02                 |
| 4-hydroxybenzoic acid <sup>a</sup>                | C <sub>7</sub> H <sub>6</sub> O <sub>3</sub>     | 3.15                 |
| Hydroxybenzoic acid glucuronide I (HBA)           | C <sub>13</sub> H <sub>14</sub> O <sub>9</sub>   | 2.00                 |
| Hydroxybenzoic acid glucuronide II (HBA)          | C <sub>13</sub> H <sub>14</sub> O <sub>9</sub>   | 2.50                 |
| Hydroxybenzoic acid sulfate (HBA)                 | C <sub>7</sub> H <sub>6</sub> O <sub>6</sub> S   | 1.89                 |

|                                               |                                                 |       |
|-----------------------------------------------|-------------------------------------------------|-------|
| <b>Hydroxyphenylacetic acid</b>               |                                                 |       |
| 3-hydroxyphenylacetic acid <sup>a</sup>       | C <sub>8</sub> H <sub>8</sub> O <sub>3</sub>    | 4.09  |
| Hydroxyphenylacetic acid glucuronide (3-HPAA) | C <sub>14</sub> H <sub>16</sub> O <sub>9</sub>  | 4.8   |
| Hydroxyphenylacetic acid sulfate (3-HPAA)     | C <sub>8</sub> H <sub>8</sub> O <sub>6</sub> S  | 2.24  |
| <b>Hydroxytyrosol</b>                         |                                                 |       |
| 3-hydroxytyrosol <sup>a</sup>                 | C <sub>8</sub> H <sub>10</sub> O <sub>3</sub>   | 2.11  |
| 3'-hydroxytyrosol-3'-glucuronide <sup>a</sup> | C <sub>14</sub> H <sub>18</sub> O <sub>9</sub>  | 2.11  |
| Hydroxytyrosol sulfate (3-HT)                 | C <sub>8</sub> H <sub>10</sub> O <sub>6</sub> S | 1.82  |
| <b>Protocatechuic acid</b>                    |                                                 |       |
| Protocatechuic acid <sup>a</sup>              | C <sub>7</sub> H <sub>6</sub> O <sub>4</sub>    | 2.25  |
| Protocatechuic acid glucuronide (PCA)         | C <sub>13</sub> H <sub>14</sub> O <sub>10</sub> | 1.67  |
| Protocatechuic acid sulfate I (PCA)           | C <sub>7</sub> H <sub>6</sub> O <sub>7</sub> S  | 1.75  |
| Protocatechuic acid sulfate II (PCA)          | C <sub>7</sub> H <sub>6</sub> O <sub>7</sub> S  | 1.94  |
| <b>Syringic acid</b>                          |                                                 |       |
| Syringic acid <sup>a</sup>                    | C <sub>9</sub> H <sub>10</sub> O <sub>5</sub>   | 5.63  |
| Syringic acid glucuronide I (SA)              | C <sub>15</sub> H <sub>18</sub> O <sub>11</sub> | 4.68  |
| Syringic acid glucuronide II (SA)             | C <sub>15</sub> H <sub>18</sub> O <sub>11</sub> | 4.88  |
| Syringic acid sulfate (SA)                    | C <sub>9</sub> H <sub>10</sub> O <sub>8</sub> S | 4.24  |
| <b>Urolithin A</b>                            |                                                 |       |
| Urolithin A <sup>a</sup>                      | C <sub>13</sub> H <sub>8</sub> O <sub>4</sub>   | 9.56  |
| Urolithin A glucuronide (Uro A)               | C <sub>19</sub> H <sub>16</sub> O <sub>10</sub> | 6.98  |
| Urolithin A diglucuronide (Uro A)             | C <sub>25</sub> H <sub>24</sub> O <sub>16</sub> | 6.88  |
| Urolithin A sulfate (Uro A)                   | C <sub>13</sub> H <sub>8</sub> O <sub>7</sub> S | 7.49  |
| <b>Urolithin B</b>                            |                                                 |       |
| Urolithin B <sup>a</sup>                      | C <sub>13</sub> H <sub>8</sub> O <sub>3</sub>   | 11.12 |
| Urolithin B glucuronide (Uro B)               | C <sub>19</sub> H <sub>16</sub> O <sub>9</sub>  | 8.51  |
| <b>Vanillic acid</b>                          |                                                 |       |
| Vanillic acid <sup>a</sup>                    | C <sub>8</sub> H <sub>8</sub> O <sub>4</sub>    | 4.74  |
| Vanillic acid glucuronide I (VA)              | C <sub>14</sub> H <sub>16</sub> O <sub>10</sub> | 2.31  |
| Vanillic acid glucuronide II (VA)             | C <sub>14</sub> H <sub>16</sub> O <sub>10</sub> | 2.76  |
| Vanillic acid sulfate (VA)                    | C <sub>8</sub> H <sub>8</sub> O <sub>7</sub> S  | 2.03  |

<sup>a</sup> Commercial standards, Rt retention time, CA coumaric acid, 3,4-DHPPA 3,4-dihydroxyphenylpropionic acid, 3-HPAA 3-hydroxyphenylacetic acid, 3-HBA 3-hydroxybenzoic acid, 3-HT 3-hydroxytyrosol, 3-HT-G 3-Hydroxytyrosol glucuronide, 4-HBA 4-hydroxybenzoic acid, DHRSV Dihydroresveratrol, ED enterodiol, EL enterolactone, GA gallic acid, PCA protocatechuic acid, SA syringic acid, Uro A urolithin A, Uro B urolithin B, VA vanillic acid. When standards were not available, the aglycone was used for quantification (shown in brackets).

**Table S2.** Log-transformed group of MPM and cardiometabolic health parameters.

| WC z-score                    |                        |                 |                | SBP z-score           |                 |                | DBP z-score           |                 |                | TG                    |                 |                | HDL-c                 |                 |                | BG                    |                 |                | MetS score             |                 |                |
|-------------------------------|------------------------|-----------------|----------------|-----------------------|-----------------|----------------|-----------------------|-----------------|----------------|-----------------------|-----------------|----------------|-----------------------|-----------------|----------------|-----------------------|-----------------|----------------|------------------------|-----------------|----------------|
|                               | $\beta$ (95 %CI)       | <i>p</i> -value | <i>p</i> -adj* | $\beta$ (95% CI)      | <i>p</i> -value | <i>p</i> -adj* | $\beta$ (95% CI)      | <i>p</i> -value | <i>p</i> -adj* | $\beta$ (95% CI)      | <i>p</i> -value | <i>p</i> -adj* | $\beta$ (95% CI)      | <i>p</i> -value | <i>p</i> -adj* | $\beta$ (95% CI)      | <i>p</i> -value | <i>p</i> -adj* | $\beta$ (95% CI)       | <i>p</i> -value | <i>p</i> -adj* |
| Coumaric acids                |                        |                 |                |                       |                 |                |                       |                 |                |                       |                 |                |                       |                 |                |                       |                 |                |                        |                 |                |
| Model 1                       | 0.01<br>(-0.02;0.04)   | 0.523           | 0.666          | 0.00<br>(-0.04;0.04)  | 0.976           | 0.976          | -0.01<br>(-0.04;0.03) | 0.705           | 0.868          | 1.75<br>(0.18;3.33)   | <b>0.030</b>    | 0.330          | -0.2<br>(-0.73;0.35)  | 0.484           | 0.847          | 0.27<br>(-0.19;0.72)  | 0.254           | 0.889          | 0.08<br>(-0.03;0.18)   | 0.144           | 0.271          |
| Model 2                       | -0.01<br>(-0.04;0.03)  | 0.646           | 0.822          | -0.02<br>(-0.06;0.02) | 0.343           | 0.437          | -0.03<br>(-0.06;0.01) | 0.142           | 0.387          | 1.54<br>(-0.23;3.3)   | 0.088           | 0.411          | 0.02<br>(-0.58;0.61)  | 0.956           | 0.956          | 0.43<br>(-0.1;0.94)   | 0.108           | 0.756          | 0.04<br>(-0.08;0.15)   | 0.513           | 0.798          |
| Dihydroxyphenylpropionic acid |                        |                 |                |                       |                 |                |                       |                 |                |                       |                 |                |                       |                 |                |                       |                 |                |                        |                 |                |
| Model 1                       | -0.01<br>(-0.02;0.01)  | 0.608           | 0.709          | -0.01<br>(-0.03;0.01) | 0.180           | 0.360          | -0.01<br>(-0.02;0.01) | 0.444           | 0.777          | 0.09<br>(-0.58;0.75)  | 0.799           | 0.974          | 0.20<br>(-0.03;0.43)  | 0.086           | 0.569          | 0.02<br>(-0.18;0.21)  | 0.853           | 0.919          | -0.02<br>(-0.07;0.03)  | 0.394           | 0.549          |
| Model 2                       | -0.01<br>(-0.02;0.01)  | 0.735           | 0.858          | -0.02<br>(-0.03;0.00) | <b>0.048</b>    | 0.231          | -0.01<br>(-0.02;0.01) | 0.249           | 0.387          | 0.11<br>(-0.61;0.83)  | 0.766           | 0.972          | 0.12<br>(-0.13;0.36)  | 0.351           | 0.956          | 0.02<br>(-0.2;0.24)   | 0.870           | 0.948          | -0.02<br>(-0.06;0.04)  | 0.572           | 0.801          |
| Dihydroresveratrol            |                        |                 |                |                       |                 |                |                       |                 |                |                       |                 |                |                       |                 |                |                       |                 |                |                        |                 |                |
| Model 1                       | -0.01<br>(-0.02;0.01)  | 0.475           | 0.666          | -0.02<br>(-0.04;0.01) | 0.093           | 0.301          | -0.01<br>(-0.02;0.01) | 0.313           | 0.626          | 0.07<br>(-0.75;0.89)  | 0.870           | 0.974          | 0.22<br>(-0.06;0.5)   | 0.122           | 0.569          | -0.09<br>(-0.32;0.15) | 0.468           | 0.919          | -0.04<br>(-0.09;0.02)  | 0.155           | 0.271          |
| Model 2                       | -0.01<br>(-0.03;0.01)  | 0.505           | 0.786          | -0.02<br>(-0.04;0.00) | <b>0.048</b>    | 0.231          | -0.01<br>(-0.03;0.01) | 0.204           | 0.387          | 0.24<br>(-0.68;1.15)  | 0.612           | 0.972          | 0.08<br>(-0.23;0.38)  | 0.623           | 0.956          | -0.07<br>(-0.34;0.2)  | 0.611           | 0.948          | -0.03<br>(-0.09;0.03)  | 0.345           | 0.634          |
| Enterodiol                    |                        |                 |                |                       |                 |                |                       |                 |                |                       |                 |                |                       |                 |                |                       |                 |                |                        |                 |                |
| Model 1                       | -0.01<br>(-0.03;0.02)  | 0.441           | 0.666          | -0.02<br>(-0.05;0.01) | 0.126           | 0.301          | -0.02<br>(-0.04;0.01) | 0.101           | 0.445          | 0.51<br>(-0.67;1.67)  | 0.399           | 0.931          | -0.05<br>(-0.45;0.35) | 0.803           | 0.950          | -0.07<br>(-0.4;0.27)  | 0.704           | 0.919          | -0.03<br>(-0.11;0.05)  | 0.431           | 0.549          |
| Model 2                       | 0.00<br>(-0.03;0.03)   | 0.981           | 0.981          | -0.02<br>(-0.04;0.02) | 0.275           | 0.385          | -0.02<br>(-0.04;0.01) | 0.219           | 0.387          | 0.42<br>(-0.85;1.69)  | 0.516           | 0.972          | -0.07<br>(-0.49;0.35) | 0.741           | 0.956          | -0.03<br>(-0.4;0.34)  | 0.880           | 0.948          | -0.01<br>(-0.09;0.08)  | 0.851           | 0.866          |
| Enterolactone                 |                        |                 |                |                       |                 |                |                       |                 |                |                       |                 |                |                       |                 |                |                       |                 |                |                        |                 |                |
| Model 1                       | -0.04<br>(-0.08;0.01)  | 0.115           | 0.350          | -0.05<br>(-0.1;0.01)  | 0.058           | 0.301          | -0.03<br>(-0.07;0.02) | 0.159           | 0.445          | -1.89<br>(-4.19;0.41) | 0.107           | 0.330          | 0.42<br>(-0.39;1.23)  | 0.306           | 0.774          | -0.15<br>(-0.82;0.54) | 0.682           | 0.919          | -0.17<br>(-0.32;-0.02) | <b>0.033</b>    | 0.231          |
| Model 2                       | -0.03<br>(-0.08;0.02)  | 0.178           | 0.498          | -0.05<br>(-0.1;0.01)  | 0.053           | 0.231          | -0.04<br>(-0.08;0.01) | 0.129           | 0.387          | -1.22<br>(-3.66;1.22) | 0.326           | 0.913          | 0.03<br>(-0.81;0.87)  | 0.945           | 0.956          | -0.01<br>(-0.74;0.73) | 0.988           | 0.988          | -0.12<br>(-0.28;0.04)  | 0.129           | 0.602          |
| Gallic acid                   |                        |                 |                |                       |                 |                |                       |                 |                |                       |                 |                |                       |                 |                |                       |                 |                |                        |                 |                |
| Model 1                       | -0.01<br>(-0.03;0.01)  | 0.239           | 0.478          | -0.01<br>(-0.03;0.02) | 0.498           | 0.697          | -0.01<br>(-0.02;0.02) | 0.926           | 0.955          | -0.67<br>(-1.42;0.09) | 0.082           | 0.330          | 0.08<br>(-0.21;0.37)  | 0.581           | 0.904          | -0.08<br>(-0.32;0.17) | 0.558           | 0.919          | -0.05<br>(-0.1;0.01)   | 0.100           | 0.271          |
| Model 2                       | -0.02<br>(-0.03;-0.01) | <b>0.041</b>    | 0.287          | -0.02<br>(-0.03;0.01) | 0.189           | 0.378          | -0.01<br>(-0.02;0.01) | 0.542           | 0.747          | -0.8<br>(-1.59;-0.01) | <b>0.048</b>    | 0.411          | 0.19<br>(-0.11;0.49)  | 0.200           | 0.933          | -0.14<br>(-0.4;0.12)  | 0.291           | 0.948          | -0.07<br>(-0.13;-0.02) | <b>0.009</b>    | 0.063          |
| Hydroxybenzoic acid           |                        |                 |                |                       |                 |                |                       |                 |                |                       |                 |                |                       |                 |                |                       |                 |                |                        |                 |                |

|                          |                        |                  |              |                       |       |       |                         |              |              |                       |       |       |                       |              |       |                        |              |           |                        |              |              |
|--------------------------|------------------------|------------------|--------------|-----------------------|-------|-------|-------------------------|--------------|--------------|-----------------------|-------|-------|-----------------------|--------------|-------|------------------------|--------------|-----------|------------------------|--------------|--------------|
| Model 1                  | 0.04<br>(-0.01;0.09)   | 0.097            | 0.350        | 0.01<br>(-0.05;0.06)  | 0.796 | 0.976 | 0.01<br>(-0.04;0.05)    | 0.744        | 0.868        | 0.16<br>(-2.33;2.64)  | 0.904 | 0.974 | -0.03<br>(-0.91;0.85) | 0.950        | 0.950 | 0.45<br>(-0.3;1.2)     | 0.235        | 0.88<br>9 | 0.10<br>(-0.07;0.27)   | 0.232        | 0.361        |
| Model 2                  | 0.04<br>(-0.02;0.09)   | 0.137            | 0.480        | -0.01<br>(-0.06;0.06) | 0.931 | 0.983 | 0.01<br>(-0.05;0.05)    | 0.942        | 0.949        | 0.14<br>(-2.57;2.84)  | 0.923 | 0.972 | -0.32<br>(-1.26;0.62) | 0.505        | 0.956 | 0.4<br>(-0.44;1.23)    | 0.348        | 0.94<br>8 | 0.10<br>(-0.08;0.27)   | 0.284        | 0.634        |
| Hydroxyphenylacetic acid |                        |                  |              |                       |       |       |                         |              |              |                       |       |       |                       |              |       |                        |              |           |                        |              |              |
| Model 1                  | 0.01<br>(-0.02;0.02)   | 0.860            | 0.926        | 0.02<br>(-0.01;0.03)  | 0.066 | 0.301 | -0.01<br>(-0.02;0.01)   | 0.696        | 0.868        | -0.09<br>(-0.82;0.65) | 0.818 | 0.974 | 0.03<br>(-0.23;0.29)  | 0.818        | 0.950 | 0.04<br>(-0.18;0.26)   | 0.736        | 0.91<br>9 | 0.00<br>(-0.05;0.05)   | 0.986        | 0.986        |
| Model 2                  | 0.01<br>(-0.01;0.02)   | 0.635            | 0.822        | 0.02<br>(-0.01;0.04)  | 0.066 | 0.231 | -0.01<br>(-0.02;0.01)   | 0.587        | 0.747        | -0.08<br>(-0.89;0.73) | 0.847 | 0.972 | 0.03<br>(-0.25;0.3)   | 0.864        | 0.956 | 0.06<br>(-0.19;0.3)    | 0.653        | 0.94<br>8 | 0.01<br>(-0.05;0.06)   | 0.855        | 0.866        |
| Hydroxytyrosol           |                        |                  |              |                       |       |       |                         |              |              |                       |       |       |                       |              |       |                        |              |           |                        |              |              |
| Model 1                  | 0.01<br>(-0.01;0.02)   | 0.517            | 0.666        | -0.01<br>(-0.02;0.02) | 0.851 | 0.976 | -0.01<br>(-0.02;0.01)   | 0.295        | 0.626        | -0.12<br>(-0.9;0.67)  | 0.772 | 0.974 | -0.06<br>(-0.33;0.22) | 0.698        | 0.950 | -0.06<br>(-0.29;0.18)  | 0.643        | 0.91<br>9 | -0.01<br>(-0.06;0.05)  | 0.720        | 0.775        |
| Model 2                  | 0.01<br>(-0.01;0.03)   | 0.347            | 0.607        | -0.01<br>(-0.03;0.02) | 0.445 | 0.519 | -0.01<br>(-0.03;0.01)   | 0.247        | 0.387        | -0.03<br>(-0.89;0.84) | 0.954 | 0.972 | -0.26<br>(-0.55;0.04) | 0.090        | 0.630 | -0.04<br>(-0.3;0.23)   | 0.789        | 0.94<br>8 | 0.01<br>(-0.05;0.07)   | 0.751        | 0.866        |
| Protocatechuic acid      |                        |                  |              |                       |       |       |                         |              |              |                       |       |       |                       |              |       |                        |              |           |                        |              |              |
| Model 1                  | -0.03<br>(-0.06;0.01)  | 0.125            | 0.350        | -0.03<br>(-0.07;0.01) | 0.129 | 0.301 | -0.03<br>(-0.05;0.01)   | 0.127        | 0.445        | 0.01<br>(-1.6;1.6)    | 0.998 | 0.998 | 0.61<br>(0.03;1.19)   | <b>0.040</b> | 0.560 | 0.06<br>(-0.44;0.55)   | 0.820        | 0.91<br>9 | -0.1<br>(-0.21;0.02)   | 0.081        | 0.271        |
| Model 2                  | -0.02<br>(-0.05;0.02)  | 0.276            | 0.552        | -0.02<br>(-0.06;0.02) | 0.261 | 0.385 | -0.02<br>(-0.05;0.02)   | 0.247        | 0.387        | -0.32<br>(-1.98;1.34) | 0.705 | 0.972 | 0.52<br>(-0.07;1.11)  | 0.083        | 0.630 | 0.06<br>(-0.47;0.58)   | 0.840        | 0.94<br>8 | -0.08<br>(-0.19;0.04)  | 0.175        | 0.613        |
| Syringic acid            |                        |                  |              |                       |       |       |                         |              |              |                       |       |       |                       |              |       |                        |              |           |                        |              |              |
| Model 1                  | 0.01<br>(-0.01;0.03)   | 0.194            | 0.453        | 0.00<br>(-0.02;0.02)  | 0.965 | 0.976 | 0.00<br>(-0.02;0.02)    | 0.955        | 0.955        | 0.69<br>(-0.18;1.54)  | 0.118 | 0.330 | -0.14<br>(-0.44;0.17) | 0.387        | 0.774 | 0.21<br>(-0.05;0.45)   | 0.114        | 0.79<br>8 | 0.05<br>(-0.02;0.1)    | 0.148        | 0.271        |
| Model 2                  | 0.02<br>(-0.01;0.03)   | 0.120            | 0.480        | 0.00<br>(-0.02;0.02)  | 0.983 | 0.983 | -0.01<br>(-0.02;0.02)   | 0.719        | 0.839        | 0.56<br>(-0.38;1.49)  | 0.245 | 0.858 | -0.1<br>(-0.41;0.23)  | 0.572        | 0.956 | 0.15<br>(-0.14;0.43)   | 0.310        | 0.94<br>8 | 0.04<br>(-0.03;0.1)    | 0.246        | 0.634        |
| Urolithin A              |                        |                  |              |                       |       |       |                         |              |              |                       |       |       |                       |              |       |                        |              |           |                        |              |              |
| Model 1                  | -0.01<br>(-0.02;0.01)  | 0.090            | 0.350        | -0.01<br>(-0.02;0.01) | 0.112 | 0.301 | -0.01<br>(-0.02;-0.01)  | <b>0.011</b> | 0.154        | -0.1<br>(-0.57;0.37)  | 0.686 | 0.974 | 0.01<br>(-0.16;0.18)  | 0.906        | 0.950 | -0.01<br>(-0.15;0.14)  | 0.986        | 0.98<br>6 | -0.03<br>(-0.06;0.01)  | 0.154        | 0.271        |
| Model 2                  | -0.01<br>(-0.02;0.01)  | 0.218            | 0.509        | -0.01<br>(-0.02;0.01) | 0.130 | 0.303 | -0.02<br>(-0.03;-0.01)  | <b>0.003</b> | <b>0.042</b> | -0.02<br>(-0.52;0.49) | 0.957 | 0.972 | -0.02<br>(-0.2;0.16)  | 0.839        | 0.956 | 0.03<br>(-0.13;0.19)   | 0.706        | 0.94<br>8 | -0.02<br>(-0.05;0.02)  | 0.362        | 0.634        |
| Urolithin B              |                        |                  |              |                       |       |       |                         |              |              |                       |       |       |                       |              |       |                        |              |           |                        |              |              |
| Model 1                  | -0.02<br>(-0.03;-0.01) | <b>0.003</b>     | <b>0.042</b> | -0.01<br>(-0.03;0.01) | 0.229 | 0.401 | -0.01<br>(-0.03;0.01)   | 0.104        | 0.445        | -0.55<br>(-1.17;0.07) | 0.081 | 0.330 | 0.11<br>(-0.14;0.36)  | 0.381        | 0.774 | -0.18<br>(-0.38;0.03)  | 0.094        | 0.79<br>8 | -0.07<br>(-0.11;-0.02) | <b>0.005</b> | 0.070        |
| Model 2                  | -0.03<br>(-0.04;-0.01) | <b>&lt;0.001</b> | <b>0.006</b> | -0.02<br>(-0.03;0.01) | 0.102 | 0.286 | -0.02<br>(-0.03;-0.003) | <b>0.013</b> | 0.091        | -0.63<br>(-1.29;0.03) | 0.059 | 0.411 | 0.11<br>(-0.16;0.36)  | 0.425        | 0.956 | -0.25<br>(-0.47;-0.04) | <b>0.024</b> | 0.33<br>6 | -0.08<br>(-0.12;-0.04) | <b>0.001</b> | <b>0.014</b> |
| Vanillic acid            |                        |                  |              |                       |       |       |                         |              |              |                       |       |       |                       |              |       |                        |              |           |                        |              |              |
| Model 1                  | 0.00<br>(-0.04;0.04)   | 0.986            | 0.986        | 0.02<br>(-0.03;0.07)  | 0.423 | 0.658 | -0.01<br>(-0.05;0.03)   | 0.604        | 0.868        | -0.2<br>(-2.42;2.04)  | 0.864 | 0.974 | 0.42<br>(-0.36;1.19)  | 0.296        | 0.774 | 0.17<br>(-0.49;0.82)   | 0.619        | 0.91<br>9 | -0.04<br>(-0.19;0.11)  | 0.619        | 0.722        |
| Model 2                  | 0.01<br>(-0.04;0.05)   | 0.823            | 0.886        | 0.03<br>(-0.02;0.08)  | 0.262 | 0.385 | -0.01<br>(-0.05;0.04)   | 0.949        | 0.949        | 0.05<br>(-2.3;2.38)   | 0.972 | 0.972 | 0.33<br>(-0.47;1.12)  | 0.422        | 0.956 | 0.22<br>(-0.48;0.92)   | 0.537        | 0.94<br>8 | -0.02<br>(-0.17;0.14)  | 0.866        | 0.866        |

$\beta$  estimated beta, BG blood glucose CI confidence interval, DBP diastolic blood pressure, HDL-c high-density lipoprotein-cholesterol, MetS metabolic syndrome, MPM microbial phenolic metabolites, SBP systolic blood pressure, TG triglycerides, WC waist circumference. Mixed-effects linear regression models between log-transformed group of MPM (aglycone plus phase II metabolites) and each cardiometabolic health parameter. Fixed effect included two models: model 1 included sex (female/male) and age (continuous, years); Model 2 included model 1 plus Tanner maturation stage (score from I to V), physical activity ( $\geq 60$ min /  $<60$ min moderate-to-vigorous physical activity), household income (low/medium/high), and energy intake (continuous, Kcal/day). Municipality and schools were considered as random effects. \*  $p$ -adjusted for multiple-testing using the Benjamin-Hochberg procedure considering a false discovery rate  $< 0.05$  as significant. P values  $< 0.05$  were considered significant.

**Table S3.** Log-transformed group of MPM and MetS and its components.

|                               | WC ≥ 90th           |                     |                    | TG ≥ 150 mg/dL      |                     |                    | HDL-c ≤ 40 mg/dL    |                     |                    | BG ≥ 110 mg/dL      |                     |                    | MetS                |                     |                    |
|-------------------------------|---------------------|---------------------|--------------------|---------------------|---------------------|--------------------|---------------------|---------------------|--------------------|---------------------|---------------------|--------------------|---------------------|---------------------|--------------------|
|                               | OR<br>(95 %CI)      | <i>p</i> -<br>value | <i>p</i> -<br>adj* | OR<br>(95 %CI)      | <i>p</i> -<br>value | <i>p</i> -<br>adj* | OR<br>(95 %CI)      | <i>p</i> -<br>value | <i>p</i> -<br>adj* | OR<br>(95 %CI)      | <i>p</i> -<br>value | <i>p</i> -<br>adj* | OR<br>(95 %CI)      | <i>p</i> -<br>value | <i>p</i> -<br>adj* |
| Coumaric acids                |                     |                     |                    |                     |                     |                    |                     |                     |                    |                     |                     |                    |                     |                     |                    |
| Model 1                       | 1.06<br>(0.96;1.17) | 0.312               | 0.485              | 1.08<br>(0.90;1.29) | 0.399               | 0.868              | 1.02<br>(0.85;1.23) | 0.821               | 0.915              | 1.02<br>(0.94;1.11) | 0.637               | 0.811              | 0.96<br>(0.79;1.18) | 0.714               | 0.859              |
| Model 2                       | 1.04<br>(0.93;1.16) | 0.580               | 0.756              | 1.06<br>(0.86;1.30) | 0.595               | 0.944              | 0.96<br>(0.81;1.15) | 0.687               | 0.802              | 1.04<br>(0.94;1.16) | 0.430               | 0.754              | 0.93<br>(0.74;1.18) | 0.562               | 0.715              |
| Dihydroxyphenylpropionic acid |                     |                     |                    |                     |                     |                    |                     |                     |                    |                     |                     |                    |                     |                     |                    |
| Model 1                       | 0.99<br>(0.96;1.03) | 0.526               | 0.669              | 1.00<br>(0.95;1.06) | 0.991               | 0.991              | 0.94<br>(0.89;1.00) | 0.050               | 0.294              | 0.99<br>(0.96;1.03) | 0.705               | 0.823              | 0.98<br>(0.90;1.06) | 0.603               | 0.859              |
| Model 2                       | 1.00<br>(0.96;1.04) | 0.648               | 0.756              | 1.00<br>(0.94;1.07) | 0.944               | 0.944              | 0.93<br>(0.87;0.99) | <b>0.048</b>        | 0.437              | 1.00<br>(0.96;1.04) | 0.922               | 0.953              | 1.01<br>(0.90;1.13) | 0.897               | 0.897              |
| Dihydroresveratrol            |                     |                     |                    |                     |                     |                    |                     |                     |                    |                     |                     |                    |                     |                     |                    |
| Model 1                       | 0.99<br>(0.95;1.03) | 0.395               | 0.553              | 1.01<br>(0.94;1.08) | 0.854               | 0.991              | 0.97<br>(0.90;1.05) | 0.449               | 0.698              | 0.98<br>(0.94;1.02) | 0.333               | 0.666              | 1.02<br>(0.91;1.14) | 0.736               | 0.859              |
| Model 2                       | 0.99<br>(0.94;1.04) | 0.455               | 0.708              | 1.01<br>(0.93;1.09) | 0.894               | 0.944              | 0.99<br>(0.90;1.09) | 0.876               | 0.943              | 0.98<br>(0.94;1.03) | 0.431               | 0.754              | 1.09<br>(0.90;1.32) | 0.356               | 0.623              |
| Enterodiol                    |                     |                     |                    |                     |                     |                    |                     |                     |                    |                     |                     |                    |                     |                     |                    |
| Model 1                       | 0.97<br>(0.91;1.02) | 0.180               | 0.315              | 1.02<br>(0.92;1.12) | 0.753               | 0.991              | 1.04<br>(0.90;1.20) | 0.580               | 0.812              | 0.97<br>(0.92;1.03) | 0.308               | 0.666              | 1.03<br>(0.87;1.23) | 0.707               | 0.859              |
| Model 2                       | 0.99<br>(0.92;1.06) | 0.610               | 0.756              | 1.01<br>(0.90;1.13) | 0.871               | 0.944              | 1.04<br>(0.89;1.21) | 0.653               | 0.802              | 0.98<br>(0.92;1.04) | 0.582               | 0.815              | 1.02<br>(0.85;1.23) | 0.798               | 0.859              |
| Enterolactone                 |                     |                     |                    |                     |                     |                    |                     |                     |                    |                     |                     |                    |                     |                     |                    |
| Model 1                       | 0.90<br>(0.79;1.02) | 0.084               | 0.201              | 0.83<br>(0.71;0.98) | 0.026               | 0.364              | 0.82<br>(0.68;1.00) | 0.052               | 0.294              | 0.96<br>(0.85;1.09) | 0.514               | 0.806              | 0.78<br>(0.59;1.02) | 0.064               | 0.299              |
| Model 2                       | 0.90<br>(0.78;1.05) | 0.162               | 0.397              | 0.86<br>(0.72;1.04) | 0.116               | 0.717              | 0.85<br>(0.68;1.06) | 0.156               | 0.437              | 1.01<br>(0.88;1.16) | 0.859               | 0.953              | 0.80<br>(0.59;1.09) | 0.165               | 0.483              |
| Gallic acid                   |                     |                     |                    |                     |                     |                    |                     |                     |                    |                     |                     |                    |                     |                     |                    |
| Model 1                       | 0.96<br>(0.93;1)    | <b>0.048</b>        | 0.201              | 0.99<br>(0.93;1.04) | 0.618               | 0.991              | 1.00<br>(0.91;1.09) | 0.992               | 0.992              | 0.97<br>(0.93;1.01) | 0.200               | 0.666              | 0.88<br>(0.81;0.96) | <b>0.003</b>        | <b>0.042</b>       |
| Model 2                       | 0.93<br>(0.89;0.98) | <b>0.002</b>        | <b>0.021</b>       | 0.97<br>(0.91;1.03) | 0.345               | 0.805              | 0.97<br>(0.88;1.07) | 0.536               | 0.802              | 0.96<br>(0.92;1.00) | 0.066               | 0.308              | 0.85<br>(0.77;0.93) | <b>0.001</b>        | <b>0.014</b>       |
| Hydroxybenzoic acid           |                     |                     |                    |                     |                     |                    |                     |                     |                    |                     |                     |                    |                     |                     |                    |



|                          |         |             |              |              |             |       |       |             |       |       |             |                  |              |             |              |       |
|--------------------------|---------|-------------|--------------|--------------|-------------|-------|-------|-------------|-------|-------|-------------|------------------|--------------|-------------|--------------|-------|
| Hydroxyphenylacetic acid |         | 1.14        |              | 0.99         |             |       | 0.98  |             |       | 0.99  |             |                  | 0.97         |             |              |       |
|                          | Model 1 | (0.99;1.32) | 0.086        | 0.201        | (0.82;1.21) | 0.958 | 0.991 | (0.77;1.24) | 0.850 | 0.915 | (0.86;1.13) | 0.852            | 0.852        | (0.67;1.40) | 0.851        | 0.916 |
|                          |         | 1.17        |              | 0.98         |             |       | 0.94  |             |       | 1.00  |             |                  | 1.06         |             |              |       |
|                          | Model 2 | (0.99;1.39) | 0.073        | 0.256        | (0.78;1.24) | 0.866 | 0.944 | (0.71;1.25) | 0.657 | 0.802 | (0.86;1.17) | 0.953            | 0.953        | (0.69;1.64) | 0.789        | 0.859 |
| Hydroxytyrosol           |         | 1.00        |              | 0.98         |             |       | 1.05  |             |       | 1.00  |             |                  | 0.97         |             |              |       |
|                          | Model 1 | (0.96;1.04) | 0.713        | 0.769        | (0.93;1.03) | 0.434 | 0.868 | (0.95;1.16) | 0.337 | 0.674 | (0.97;1.04) | 0.819            | 0.852        | (0.90;1.06) | 0.531        | 0.859 |
|                          |         | 1.01        |              | 0.97         |             |       | 1.04  |             |       | 1.01  |             |                  | 0.97         |             |              |       |
|                          | Model 2 | (0.97;1.06) | 0.755        | 0.772        | (0.92;1.02) | 0.256 | 0.717 | (0.93;1.16) | 0.492 | 0.802 | (0.97;1.06) | 0.527            | 0.815        | (0.89;1.06) | 0.499        | 0.699 |
| Protocatechuic acid      |         | 1.00        |              | 0.99         |             |       | 0.96  |             |       | 0.99  |             |                  | 0.94         |             |              |       |
|                          | Model 1 | (0.96;1.05) | 0.998        | 0.998        | (0.93;1.06) | 0.829 | 0.991 | (0.89;1.03) | 0.245 | 0.656 | (0.95;1.03) | 0.576            | 0.806        | (0.86;1.02) | 0.115        | 0.369 |
|                          |         | 1.01        |              | 0.99         |             |       | 0.94  |             |       | 1.00  |             |                  | 0.91         |             |              |       |
|                          | Model 2 | (0.96;1.06) | 0.772        | 0.772        | (0.92;1.06) | 0.789 | 0.944 | (0.86;1.02) | 0.134 | 0.437 | (0.95;1.04) | 0.886            | 0.953        | (0.83;0.99) | <b>0.027</b> | 0.189 |
| Syringic acid            |         | 0.93        |              | 1.11         |             |       | 0.95  |             |       | 0.93  |             |                  | 1.00         |             |              |       |
|                          | Model 1 | (0.85;1.02) | 0.102        | 0.204        | (0.98;1.27) | 0.102 | 0.597 | (0.82;1.09) | 0.448 | 0.698 | (0.85;1.01) | 0.101            | 0.471        | (0.79;1.27) | 0.982        | 0.982 |
|                          |         | 0.94        |              | 1.13         |             |       | 0.95  |             |       | 0.94  |             |                  | 0.90         |             |              |       |
|                          | Model 2 | (0.85;1.04) | 0.170        | 0.397        | (0.98;1.31) | 0.099 | 0.717 | (0.82;1.10) | 0.483 | 0.802 | (0.85;1.03) | 0.182            | 0.425        | (0.73;1.11) | 0.317        | 0.623 |
| Urolithin A              |         | 1.06        |              | 1.10         |             |       | 1.08  |             |       | 1.03  |             |                  | 1.17         |             |              |       |
|                          | Model 1 | (1;1.12)    | 0.079        | 0.201        | (0.97;1.25) | 0.128 | 0.597 | (0.94;1.26) | 0.281 | 0.656 | (0.98;1.08) | 0.252            | 0.666        | (0.85;1.61) | 0.338        | 0.676 |
|                          |         | 1.11        |              | 1.07         |             |       | 1.06  |             |       | 1.04  |             |                  | 1.13         |             |              |       |
|                          | Model 2 | (1.02;1.21) | <b>0.019</b> | 0.089        | (0.95;1.21) | 0.254 | 0.717 | (0.92;1.21) | 0.427 | 0.802 | (0.98;1.09) | 0.178            | 0.425        | (0.83;1.52) | 0.439        | 0.683 |
| Urolithin B              |         | 0.98        |              | 1.00         |             |       | 0.95  |             |       | 0.97  |             |                  | 0.95         |             |              |       |
|                          | Model 1 | (0.96;1.01) | 0.071        | 0.201        | (0.96;1.03) | 0.885 | 0.991 | (0.90;1.01) | 0.104 | 0.364 | (0.94;0.99) | <b>0.020</b>     | 0.140        | (0.89;1.02) | 0.152        | 0.369 |
|                          |         | 0.99        |              | 1.00         |             |       | 0.95  |             |       | 0.97  |             |                  | 0.95         |             |              |       |
|                          | Model 2 | (0.96;1.02) | 0.271        | 0.542        | (0.96;1.05) | 0.873 | 0.944 | (0.89;1.01) | 0.103 | 0.437 | (0.94;0.99) | <b>0.024</b>     | 0.168        | (0.88;1.03) | 0.206        | 0.483 |
| Vanillic acid            |         | 0.95        |              | 0.97         |             |       | 0.92  |             |       | 0.93  |             |                  | 0.88         |             |              |       |
|                          | Model 1 | (0.92;0.99) | <b>0.010</b> | 0.140        | (0.92;1.02) | 0.248 | 0.694 | (0.84;1.00) | 0.063 | 0.294 | (0.90;0.97) | <b>&lt;0.001</b> | <b>0.006</b> | (0.77;1.00) | 0.057        | 0.299 |
|                          |         | 0.94        |              | 0.98         |             |       | 0.93  |             |       | 0.92  |             |                  | 0.85         |             |              |       |
|                          | Model 2 | (0.89;0.98) | <b>0.003</b> | <b>0.021</b> | (0.92;1.03) | 0.436 | 0.872 | (0.83;1.03) | 0.152 | 0.437 | (0.88;0.96) | <b>&lt;0.001</b> | <b>0.001</b> | (0.73;0.99) | <b>0.048</b> | 0.224 |
|                          | Model 1 | (0.91;1.17) | 0.714        | 0.769        | (0.92;1.37) | 0.248 | 0.694 | (0.82;1.36) | 0.679 | 0.864 | (0.92;1.17) | 0.530            | 0.806        | (0.90;1.88) | 0.158        | 0.369 |

|         |             |       |       |             |       |       |             |       |       |             |       |       |             |       |       |
|---------|-------------|-------|-------|-------------|-------|-------|-------------|-------|-------|-------------|-------|-------|-------------|-------|-------|
|         | 1.07        |       |       | 1.15        |       |       | 1.00        |       |       | 1.12        |       |       | 1.30        |       |       |
| Model 2 | (0.92;1.24) | 0.436 | 0.708 | (0.92;1.43) | 0.232 | 0.717 | (0.76;1.32) | 0.998 | 0.998 | (0.96;1.29) | 0.143 | 0.425 | (0.87;1.94) | 0.207 | 0.483 |

BG blood glucose, CI confidence interval, HDL-c high-density lipoprotein-cholesterol, MetS metabolic syndrome, MPM microbial phenolic metabolites, TG triglycerides, WC waist circumference. Mixed-effects logistic regression models between log-transformed group of MPM (aglycone plus phase II metabolites) and MetS and its components. Fixed effect included two models: model 1 included sex (female/male) and age (continuous, years); Model 2 included model 1 plus Tanner maturation stage (score from I to V), physical activity ( $\geq 60$ min /  $<60$ min moderate-to-vigorous physical activity), household income (low/medium/high), and energy intake (continuous, Kcal/day). Municipality and schools were considered random effects. High blood pressure was not considered in the statistical analysis as only 2 participants had this condition (systolic blood pressure  $\geq 130$  mm Hg or diastolic blood pressure  $\geq 85$  mm Hg), and therefore the analysis did not converge. \* p-adjusted for multiple-testing using the Benjamin-Hochberg procedure considering a false discovery rate  $< 0.05$  as significant. P values  $< 0.05$  were considered significant.
